# Supplementary material for: Isothermal amplification detection of miRNA based on the catalysis of nucleases and voltammetric characteristics of silver nanoparticles
Source: Royal Society of Chemistry journal article supplement (doi:10.1039/c6mb00659k), 2016-10-20
Supplement: c6mb00659k1.pdf [file c6mb00659k1.pdf]

*Supporting Information*

**Isothermal amplification detection of miRNA based on catalysis of nucleases and voltammetric characteristics of silver nanoparticles**

Jianhua Xu,<sup>a</sup> Kun Han,<sup>b</sup> Dongdong Liu,<sup>a</sup> Li Lin<sup>a</sup> and Peng Miao<sup>\*b</sup>

<sup>a</sup> *Department of Laboratory Science, the Second Affiliated Hospital of Guangzhou University of Chinese Medicine, Guangzhou, 510120, P. R. China*

<sup>b</sup> *Suzhou Institute of Biomedical Engineering and Technology, Chinese Academy of Sciences, Suzhou 215163, P. R. China*

\* Corresponding author. E-mail: miaopeng@sibet.ac.cn.

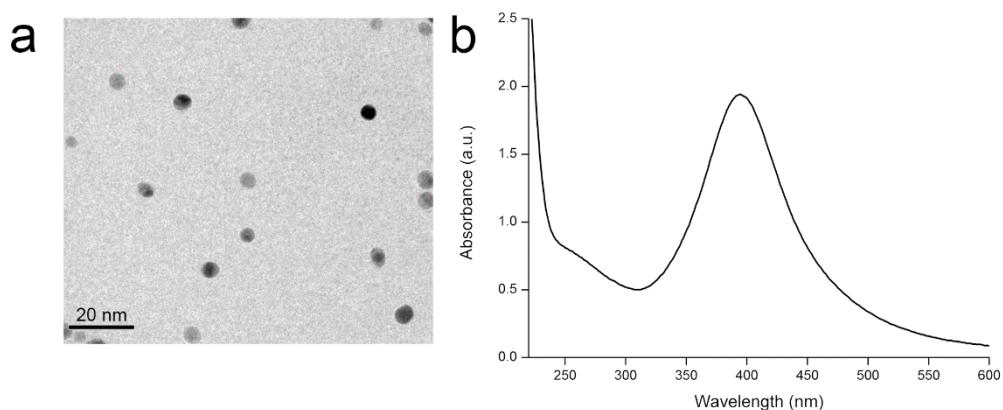

**Fig. S1** (a) Transmission electron microscopy (TEM) image of freshly prepared AgNPs. (b) UV-vis spectrum of AgNPs versus pure water as blank composition with the characteristic absorbance peak at the wavelength of 394 nm (10 mm optical path length).

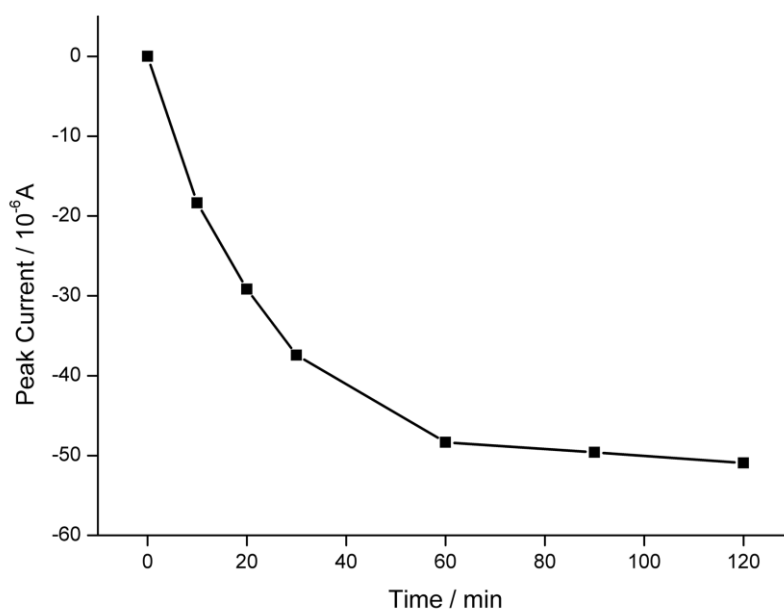

**Fig. S2** Relationship between LSV peak current and the incubation durations of the DNA2 modified electrode in AgNPs solution.

**Table S1** DNA and miRNA sequences used in this study.<sup>a</sup>

| Name        | Sequence (from 5' to 3')                                                                                      |
|-------------|---------------------------------------------------------------------------------------------------------------|
| DNA1        | AAAGTCTCGCTCTCTGCCCTCATT <b>TTAAATGCTGAGGAA</b>                                                               |
| DNA2        | SH-(CH <sub>2</sub> ) <sub>6</sub> -TTTT <b>TTCTCAGCATT</b> -(CH <sub>2</sub> ) <sub>6</sub> -NH <sub>2</sub> |
| miR-423-5p  | UGAGGGGCAGAGAGCGAGACUUU                                                                                       |
| miR-17-5p   | CAAAGUGCUUACAGUGCAGGUAG                                                                                       |
| miR-21      | UAGCUUAUCAGACUGAUGUUGA                                                                                        |
| let-7a      | UGAGGUAGUAGGUUGUAUAGUU                                                                                        |
| mismatched1 | UGAGGGGCAG <b>T</b> GAGCGAGACUUU                                                                              |
| mismatched2 | UGAGGGGCAGAGAGCG <b>ATT</b> CUUU                                                                              |

<sup>a</sup> The bold sequences are the recognition site for Nt.BbvCI.
